# Supplementary material for: Comparing two types of perspective taking as strategies for detecting distress amongst parents of children with cancer: A randomised trial
Source: PLoS One. 2017 Apr 6;12(4):e0175342. doi: 10.1371/journal.pone.0175342 (PMC5383290; doi:10.1371/journal.pone.0175342)
Supplement: S1 File — (DOCX) [file pone.0175342.s001.docx]

## Sheet: Dataset
ID	Group	Gender	Children	Age	Ethnicity	Title	Oncology	Experience_parents	Length_consultation_patient	Frequency_patient	Length_consultation_parent	Frequency_parent	Émotions	Difficult	Satisfying	Self_efficacy	DT_1_interview	Conc_self_intervention	Conc_other_intervention	Habit	Strategy_intervention	ERS_1	ERS_2	ERS_3	ERS_4	ERS_5	ERS_6	ERS_7	ERS_8	ERS_9	ERS_10	ERS_11	ERS_12	ERS_13	ERS_14	ERS_15	ERS_16	ERS_17	ERS_18	ERS_19	ERS_20	ERS_21	ERS_22	ERS_23	ERS_24	ERS_25	ERS_26	Emp_Con	Pers_Dis
2	1	1	1	56	1	1	0	420	60	3.5	60	3.5	1	1	3	6	7	5	7	1	1	2	5	3	6	1	5	1	1	1	1	4	5	1	4	1	3	6	4	1	1	4	2	1	1	5	5	2.83333	2.75
4	1	1	2	21	3	4	0	0								6	8	8	9	1	2	4	5	6	7	4	5	6	4	3	2	6	5	2	5	6	5	4	1	1	1	1	1	1	4	3	7	5.16667	3.75
6	1	1	1	33	4	4	0	0								5	8	6	8	1	1	3	3	5	6	6	4	6	6	6	3	3	6	1	2	5	5	5	1	2	2	2	2	2	4	5	5	5.5	3.25
7	1	2	2	33	1	4	0	0								5	7	5	7	1	1	1	5	6	5	4	4	5	5	5	1	4	6	3	5	5	4	3	1	1	2	3	5	1	5	5	6	4.83333	3.625
10	1	1	2	22	5	8	72	72	60	1			1	0	6	4.5	9	9	8	1	1	5	6	7	6	1	2	1	1	1	2	7	7	1	3	1	1	7	3	1	3	2	2	1	1	1	7	4	2.75
12	1	2	1	39	1	1	108	132		5		5	1	3	12.5	7	9	5	9		1	1	1	4	7	2	2	4	2	1	1	3	5	1	1	4	1	1	1	1	1	1	1	1	4	1	2	3.33333	1.125
14	1	1	1	56	1	5	42	42		1.5		1.5	1	4.5	8.5	6	8	8	8	1	2	1	4	4	2	4	2	3	1	1	1	1	6	2	3	5	1	6	1	1	1	3	2	2	1	3	6	4.66667	1.875
16	1	1	2	26	1	3	6	42	20	22.5	15	5	2	0	20	5	6	6	8	1	1	1	5	6	7	1	1	1	3	3	1	3	5	1	2	3	2	6	1	4	4	4	4	2	1	3	6	3.66667	2.375
18	1	2	2	34	1	3	24	96	25	3	25	3	1	2	7	5	7	7	7	1	1	2	4	3	3		6	4	3	2	2	1	5	1	5	4	2	6	3	5	4	6	6	2	3	6	7	4.4	3.25
20	1	1	2	30	1	3	18	60	30	2	30	2	1	2.5	8	5	9	3	7	1	1	3	6	4	6	1	4	2	5	3	5	4	6	1	5	3	5	6	1	2	3	6	6	4	1	4	7	3.66667	3.75
22	1	1	2	20	1	4	0	0								6	8	8	8	1	1	3	6	1	5	3	1	1	6	1	6	4	6	4	6	1	5	5	4	6	1	2	1	4	1	6	6	2.83333	3.375
24	1	1	2	20	1	4	0	0								6	8	9	7	1	1	5	6	3	5	3	5	3	4	5	4	1	4	5	6	4	7	6	2	3	3	5	6	2	7	6	3	3.83333	5.25
26	1	1	2	21	1	4	0	2								6	9	8	7	1	2	4	6	1	6	1	4	1	5	6	4	4	5	1	5	1	5	5	4	1	4	6	5	4	1	5	7	2.33333	4.375
28	1	1	2	27	5	4	0	0								5	9	8	8	2	2	6	5	6	7	6	6	4	5	4	4	6	7	5	5	4	6	7	4	7	5	5	5	6	4	6	6	5.66667	5.25
30	1	1	2	20	1	4	0	1								5	9	6	8	1	1	1	5	2	6	4	2	2	5	3	2	1	6	1	4	3	2	6	4	2	1	5	4	1	3	5	5	3.83333	2.375
32	1	1	2	22	5	4	0	0								6	8	7	8	1	2	3	5	6	7	5	6	6	7	7	7	4	7	4	7	5	5	7	4	4	7	7	4	3	4	7	7	6	5.5
34	1	1	2	21	1	4	0	0								5	8	8	7	2	2	1	5	5	7	6	3	1	1	1	4	4	7	3	5	1	1	4	1	1	2	5	5	1	1	5	5	4	2.625
36	1	1	2	21	1	4	0	0								5	10	7	9	2	2	7	6	4	7	7	7	2	5	3	7	7	7	5	6	4	1	4	7	7	2	7	3	1	4	7	7	4.66667	4.625
38	1	1	2	23	1	4	0	0								4	7	6	6	1	1	1	3	1	3	2	1	1	5	1	2	5	2	1	1	1	4	4	1	4	1	1	1	4	1	2	3	1.83333	1.625
40	1	1	2	21	1	8	0	12					1			5	8	5	8	1	1	1	4	1	7	3	5	1	4	4	3	5	6	3	6	3	1	2	4	1	5	3	2	4	2	3	4	2.66667	3.625
43	1	1	2	30	1	2	110	110	15	1	15	1	1	3.5	1.5	4	7	3	6	1	1	4	6	6	6	5	2	5	3	2	1	4	6	1	2	4	1	4	1	1	2	2	2	2	5	3	3	5	2.5
45	1	1	1	38	1	1	180	180	75	1.5	45	1.5	1	2	1	4	6	5	7	1	1	2	5	5	6	3	4	6	4	4	2	5	5	3	3	5	4	4	2	2	4	4	4	4	5	5	6	4.66667	3.625
47	1	1	1	43	1	1	216	252	22.5	1.5	22.5	1.5	1	0	2	6	9	7	8	2	2	5	7	7	7	7	4	5	2	7	2	1	7	2	7	7	3	7	3	1	2	7	7	2	5	7	7	6.66667	4.625
49	1	1	2	45	1	2	54	42	35	1	35	1	1	5	20	7	9	3	7	1		1	2	7	6	6	3	5	1	1	1	1	7	1	1	6	1	3	1	1	1	1	2	1	5	1	6	5.66667	1.375
51	1	1	1	36	1	1	132	132	45		45		1	2	1	6	9	8	8	1	1	4	6	6	6	6	4	6	5	1	1	4	6	1	2	6	4	6	2	2	2	4	6	4	6	6	6	6	3
53	1	1	1	56	1	1	240	300	60	1.5	60	1.5	1	0	2.5	5	9	6	6	1	1	2	1	1	2	1	2	3	1	1	1	1	2	1	1	1	1	1	1	2	2	2	2	1	1	1	1	1.5	1.375
55	1	1	2	23	1	8	0	1	35	2			1	1	0	5	9	7	7	2	1	1	3	4	6	4	1	4	1	1	1	3	4	1	1	4	2	2	1	1	1	3	1	1	4	3	4	3.66667	1.375
57	1	2	2	22	1	8	0	6	30	1						5	6	8	8	1	1	1	3	1	6	2	1	1	1	1	1	6	7	1	1	1	1	3	1	1	1	3	3	1	4	3	5	2.5	1.25
59	1	1	2	29	1	8	0	1	15	7			1	0	0	6	8	6	8	1	2	1	3	3	5	5	3	4	3	3	3	5	5	2	3	5	3	5	1	1	2	2	3	2	4	3	5	4.5	2.5
61	1	2	1	55	1	6	60	300					2	0		6	7.5	5	5	1	1	2	2	4	6	4	2	4	2	4	1	1	2	1	2	4	2	2	1	1	1	2	1	2	5	3	4	3.33333	2
62	1	1	1	61	1	7	240	348	60		60		1	3	3	6	10	4	8	1	1	7	2	5	7	5	4	6	7	1	1	3	7	1	2	5	6	5	3	2	2	3	3	3	5	3	6	5.5	3.125
1	2	2	1	41	1	3	120	168	7.5	5	7.5	5	2	0		5	7.5	4	7		1	2	4	6	6	4	2	3	2	3	1	1	6	1	3	4	2	4	1	4	2	4	4	2	4	4	4	4.5	2.375
3	2	1	2	21	2	4	0	0								4	7	3	6	1	1	3	3	1	5	4	1	1	2	2	1	4	5	1	4	3	3	5	1	6	1	4	2	1	4	4	6	3.16667	2.25
5	2	1	2	30	4	4	0	0								4	4	4	8	1	1	1	5	5	5	3	3	1	3	1	1	3	5	1	2	1	1	5	1	1	1	1	2	1	1	3	3	3.33333	1.875
8	2	1	1	41	4	4	0	0								6	10	9	9	2	1	4	6	3	7	5	2	6	6	5	3	4	5	1	1	2	3	7	1	3	1	1	3	1	6	5	6	4.66667	2.875
9	2	1	1	45	1	1	300	300		5		5	1	3	5	3	8	1	8	1	1	1	3	7	7	7	2	6	3	2	1	1	6	2	2	6	2	6	1	1	1	1	1	1	6	2	6	6.33333	1.875
11	2	1	2	32	1	1	11	20	20	5	20	5	1	1	5	6	9	1	5	1	1	1	3	1	6	5	1	3	2	1	1	2	1	1	1	3	4	1	2	3	2	2	2	2	4	2	6	2.33333	1.75
13	2	1	2	30	1	3	32	84	30	2.5	30	1.5	1	1	6	5	8	6	9	2	1	1	5	1	7	1	6	1	1	1	2	1	6	1	5	5	1	6	1	6	1	1	1	1	1	5	6	3.33333	2.625
15	2	1	2	27	1	6	42	50	37.5		37.5		2	3.5	1.5	2	6	3	7	1	1	1	5	2	6	6	2	5	4	2	2	2	7	1	3	5	2	7	2	6	2	5	5	2	5	3	7	5.33333	2.25
17	2	2	1	35	3	3	96	120	12.5	1	30	1	2	1	1	5	9	9	9	2	2	1	5	3	5	5	3	5	5	4	3	2	6	1	2	5	1	4	1	1	1	2	5	2	5	3	5	4.66667	2.25
19	2	1	2	30	1	3	43	3	45	1	45	1	1	0	5	5	7	5	5	1	1	1	1	1	4	4	1	1	1	1	1	1	5	1	1	1	1	1	1	1	1	1	1	1	1	1	1	2.16667	1
21	2	1	2	20	1	4	0	0								5	7	6	6	1	1	2	4	4	6	1	5	1	5	5	3	2	6	1	5	2	1	4		1	3	4	4	1	2	6	6	3	3.25
23	2	1	2	20	1	4	0	0								3	7	8	7	1	1	1	2	2	6	1	4	1	5	1	1	4	3	2	1	1	1	3	4	1	1	1	1	2	1	1	4	1.83333	1.625
25	2	1	2	21	1	4	0	1				2.5	1			4		1	9		1	1	5	3	5	2	6	4	6	6	5	5	7	7	6	6	5	5	5	1	5	7	5	3	4	6	6	4.5	5.125
27	2	2	2	20	1	4	0	0								5	7	4	7	1	1	2	4	3	6	4	5	2	4	3	3	5	4	1	3	2	4	5	3	2	3	4	3	3	2	3	5	3.33333	3.125
29	2	1	2	20	2	4	3	0	4	2	0	0	1			2	9	9	5	2	2	3	5	4	5	4	3	1	5	1	1	4	4	1	2	1	1	3	1	4	4	6	6	5	1	3	4	2.83333	2.5
31	2	1	2	21	1	4	2	0	120	4						6	8	8	9	1	1	3	5	4	7	4	5	5	4	4	4	4	6	3	5	5	4	6	4	1	3	3	6	2	1	4	6	5	4
33	2	1	1	20	5	4	0	0								5	8	7	8		2	4	6	5	7	7	6	7	5	4	6	6	5	4	4	6	3	6	3	6	7	6	7	4	4	7	7	6	4.75
35	2	1	2	22	1	4	0	0								5	8	5	9	1	1	2	4	4	7	6	5	7	5	1	1	6	6	1	1	5	4	5	1	1	1	1	1	1	1	3	4	5.5	2.375
37	2	1	2	30	6	4	0	0								6	10	3	9	1	1	6	4	5	7	5	3	4	2	3	2	5	6	1	3	5	1	4	2	2	3	4	4	1	4	5	6	4.83333	3
39	2	1	2	21	1	4	0	0								4	7	3	8	1	1	2	4	1	6	3	2	5	3	2	2	2	3	1	2	4	2	5	2	2	2	1	4	2	3	3	5	3.5	2.125
41	2	2	2	23	5	4	0	0	15	2	15	2	2	0	0	3	8	8	7	2	2	1	2	2	6	5	6	3	4	1	1	4	5	1	1	3	3	3	1	1	1	4	2	1	4	1	6	3.5	2
42	2	1	1	47	1	6	120	300		1	60	1	1	2	5	5	8	6	9	1	1	2	5	5	7	7	4	7	6	5	2	2	7	3	6	7	2	6	2	5	2	3	3	2	6	2	6	6.5	3.625
44	2	2	2	26	1	2	24	72	30		7.5		1	1	8	6	7	5	8	1	1	1	4	3	6	2	4	1	3	1	1	3	4	4	2	1	2	2	3	2	2	3	3	2	1	1	3	2.16667	2.5
46	2	1	1	47	1	1	36	312	17.5	1	22.5	1	1	5	10	6	9	7	7	1	2	2	5	6	7	4	2	5	1	1	1	3	6	1	1	5	1	1	1	1	1	1	1	1	1	1	4	4.5	1.75
48	2	1	2	31	1	1	84	114		1.5		1.5	1	6	10	7	6	3	8	1	1	2	4	2	6	1	3	6	2	1	1	1	6	2	1	3	1	2	1	1	1	1	1	2	2	3	4	3.33333	1.875
50	2	1	2	29	1	1	108	108	60	2	60	2	1	1	8	5	8	1	9	1	1	3	2	3	6	6	1	7	3	1	1	6	7	1	1	7	3	2	1	1	1	1	1	1	7	2	6	5.33333	1.625
52	2	1	2	27	1	1	66	66	20	1	60	1	1	2	8	7	9	2	8	1	2	4	3	3	6	6	1	3	1	4	2	4	5	1	4	5	1	5	1	1	1	4	3	4	4	2	4	4.5	2.375
54	2	1	2	21	1	4	0	1					2			4	7	2	8	1	1	2	3	5	6	5	3	5	4	1	2	5	6	2	3	5	4	5		5	5	5	3	3	5	3	5	5.16667	2.875
56	2	1	2	28	1	4	0	0	30	3.5			1	2	2	7	9	8	9	1	1	1	2	5	7	1	3	1	3	2	1	3	7	4	4	1	1	5	1	1	2	1	2	4	1	4	6	3.33333	2.375
58	2	1	2	22	1	8	0	1	45							5	9	1	9	1	1	1	3	1	6	1	2	1	3	1	2	7	3	1	4	2	3	3	1	1	2	2	2	2	2	2	3	1.83333	2.125
60	2	1	1	35	1	7	112	156	75		75		1	0	3	4.5	7	3	6	2	1	1	3	3	4	1	1	1	1	1	1	1	5	1	1	2	3	4	1	1	1	1	1	1	2	2	4	2.66667	1.5
63	2	1	1	40	1	7	174	204	75		75		1	1		5	5	5	8	1	1	1	2	1	7	6	2	5	4	1	1	7	7	1	1	7	3	5	2	1	1	3	5	1	7	3	7	5.16667	1.5
[truncated: 41 more columns]
